# Supplementary material for: Codon usage patterns in Chinese bayberry (Myrica rubra) based on RNA-Seq data
Source: PubMed Central journal article supplement (PMC4008310; doi:10.1186/1471-2164-14-732), 2013-10-25

# Asn

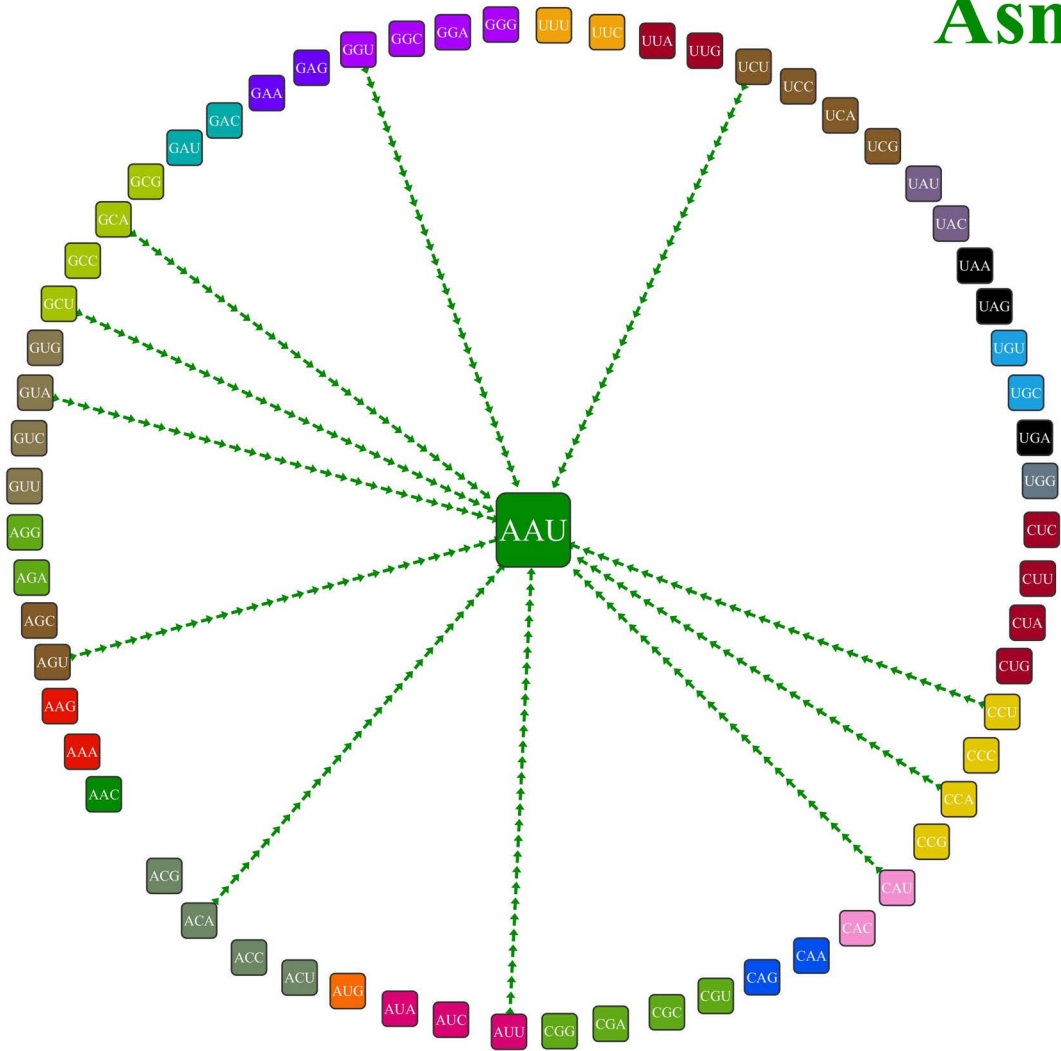



# Cys

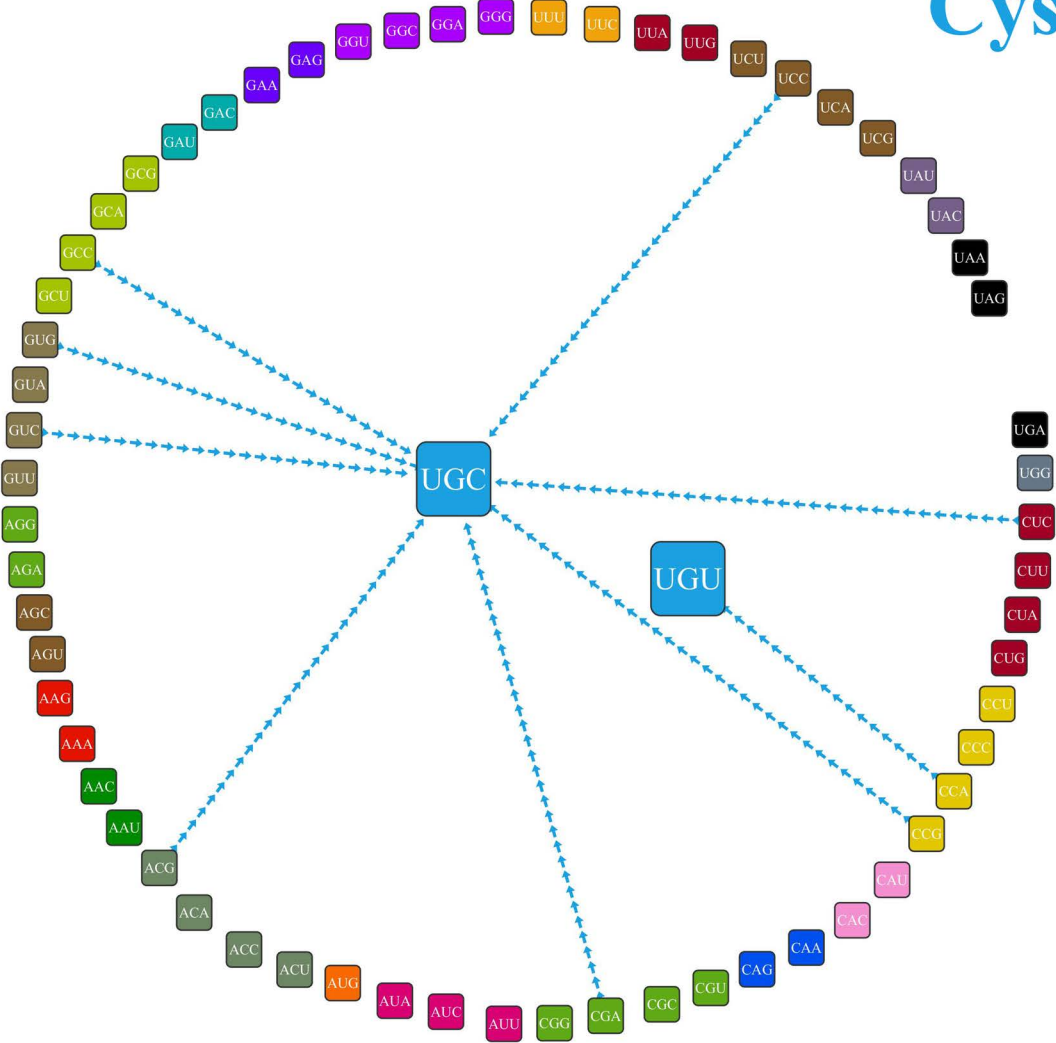



Glu

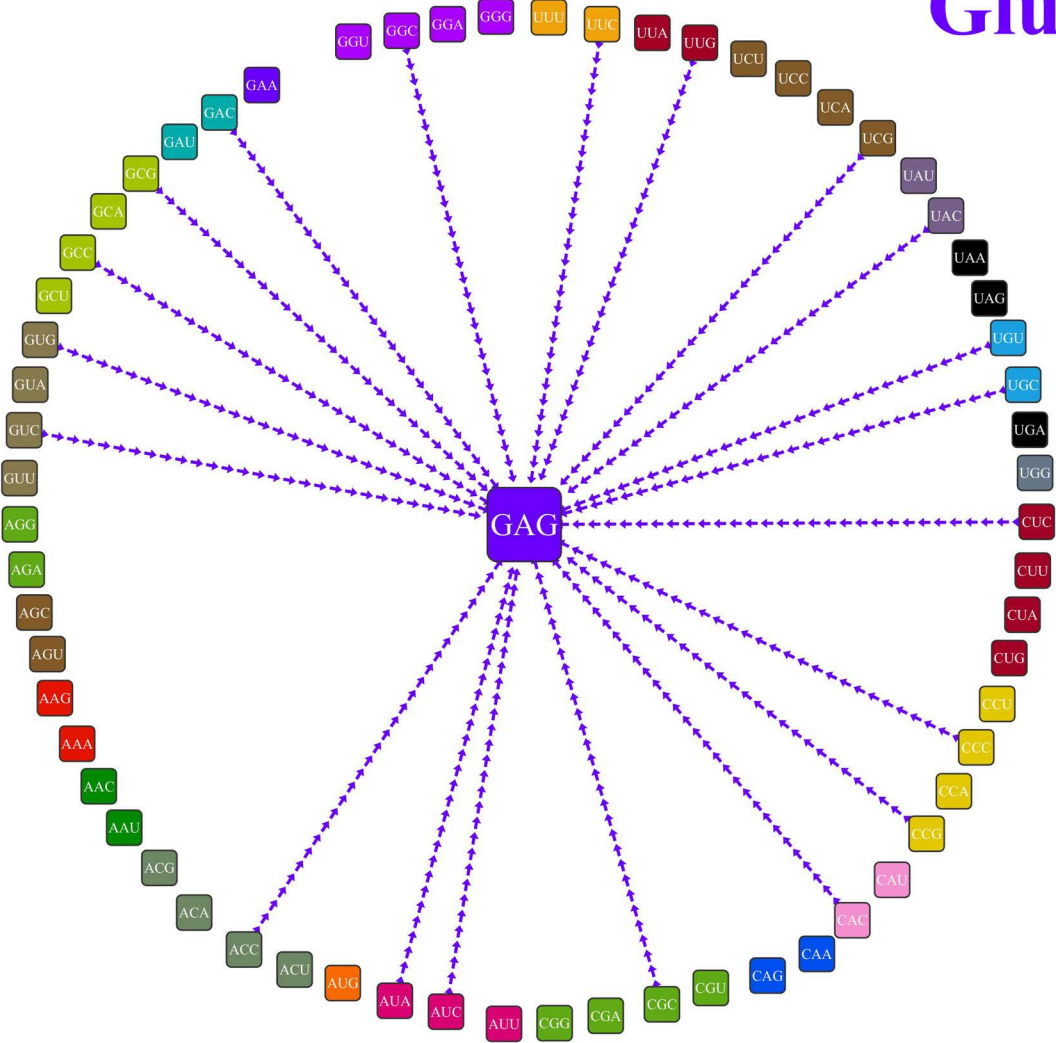

Gly

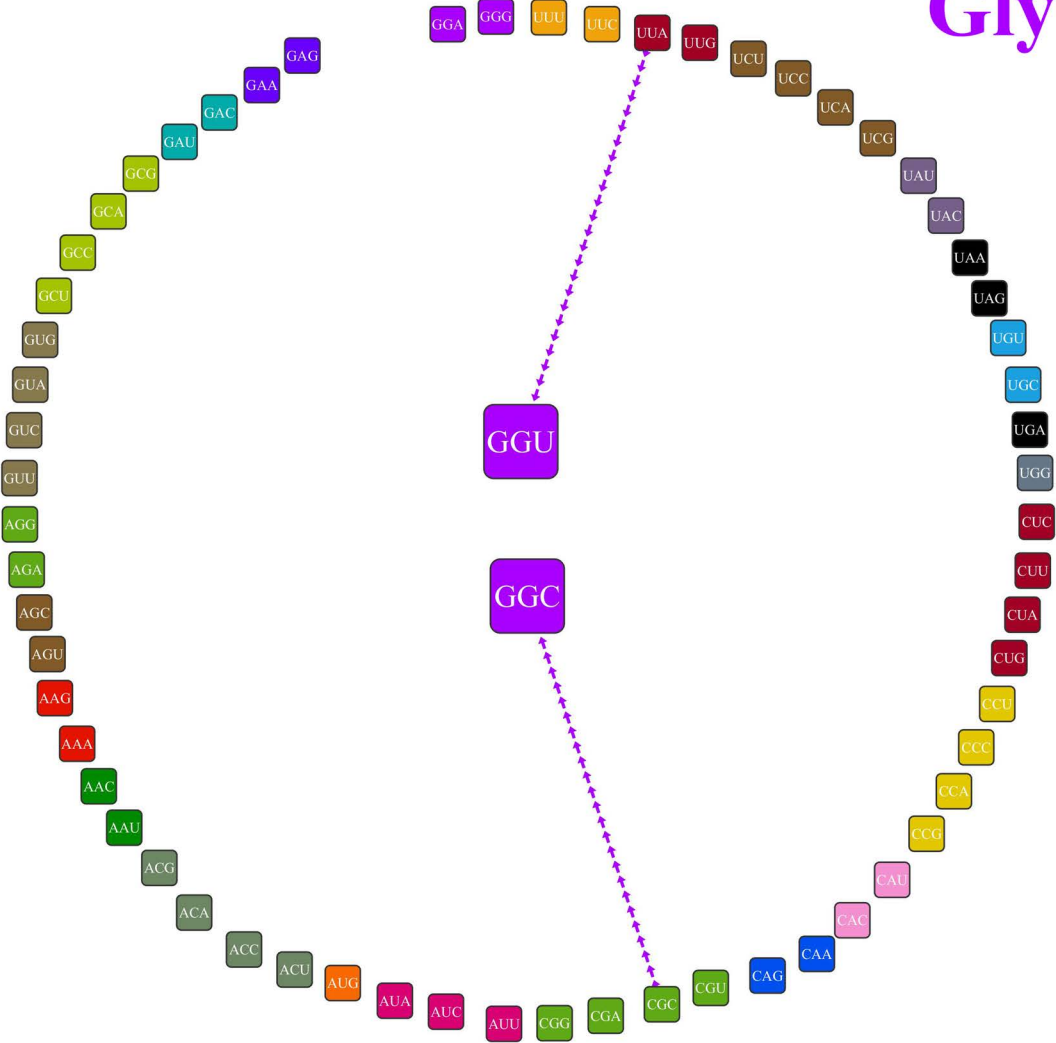





Ile

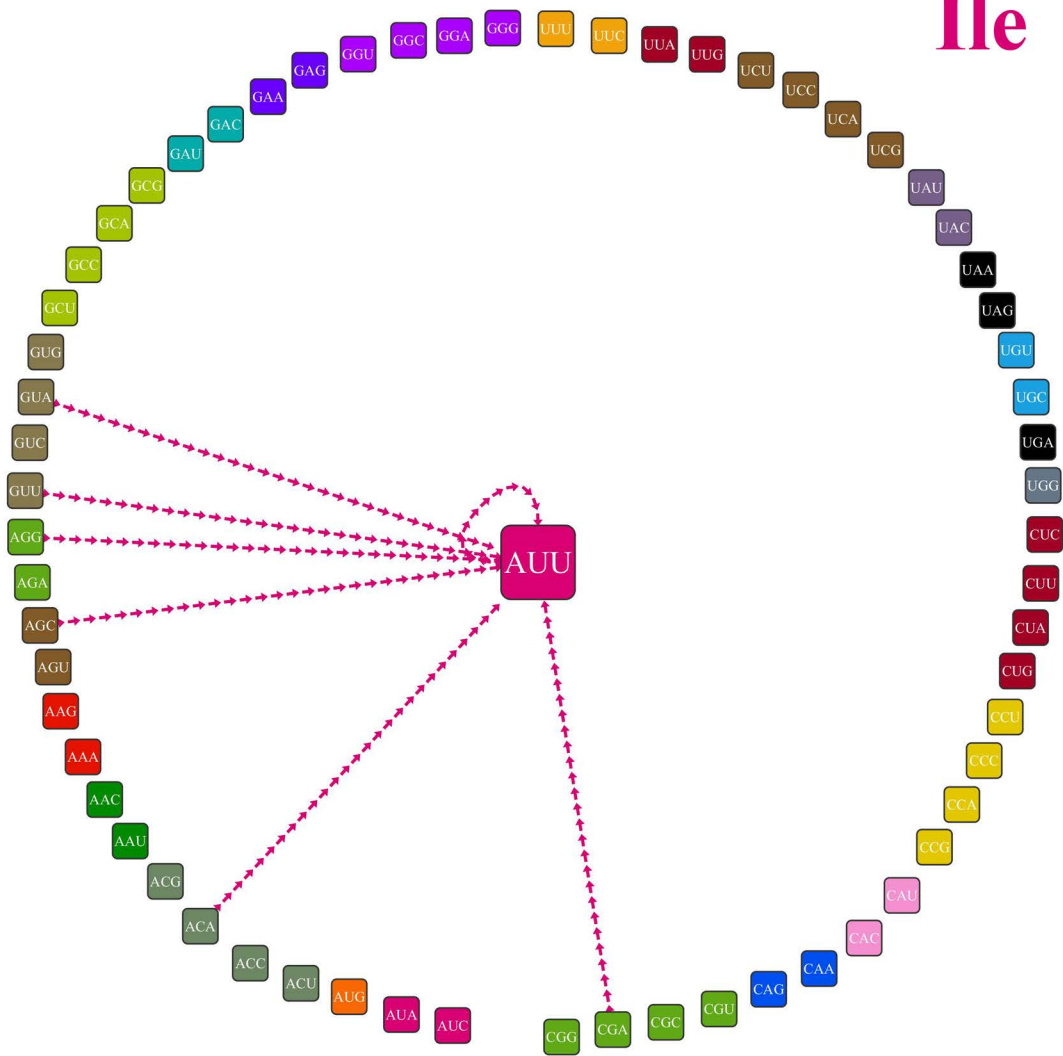











Thr

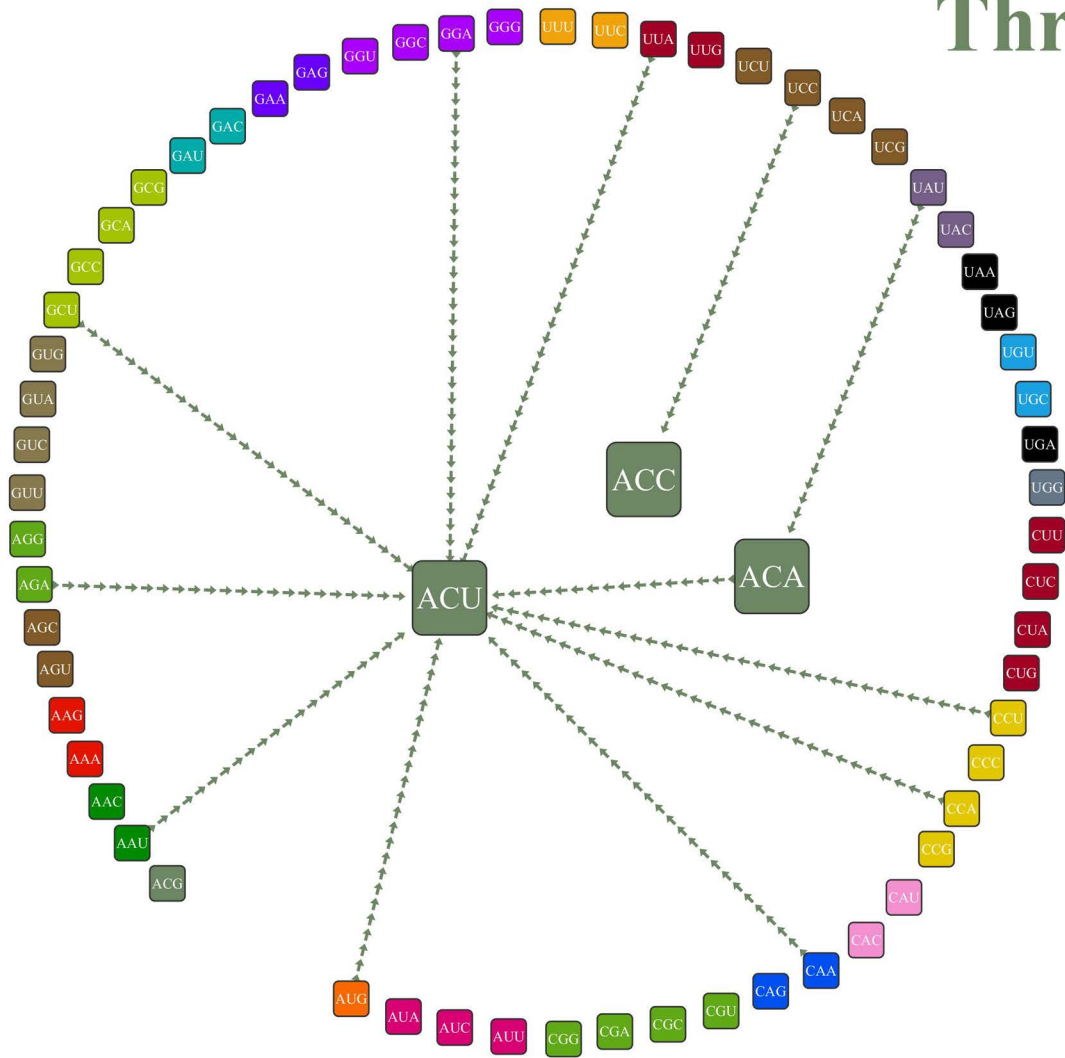

Supplement: 1471-2164-14-732-S4.pdf [file 1471-2164-14-732-S4.pdf]
